# Supplementary material
Source: PubMed Central journal article supplement (PMC5030619)
Supplement: inan_a_1196251_sm8414.pdf [file inan_a_1196251_sm8414.pdf]

SUPPLEMENTARY INFORMATION for

**Multilaboratory evaluation of 15 bioassays for (eco)toxicity screening and hazard ranking of engineered nanomaterials: FP7 project NANOVALID**

Nanotoxicology

Olesja M Bondarenko<sup>1\*</sup>, Margit Heinlaan<sup>1</sup>, Mariliis Sihtmäe<sup>1</sup>, Angela Ivask<sup>1</sup>, Imbi Kurvet<sup>1</sup>, Elise Joonas<sup>1,2</sup>, Anita Jemec<sup>3</sup>, Marika Mannerström<sup>4</sup>, Tuula Heinonen<sup>4</sup>, Rohit Rekulapelly<sup>5</sup>, Shashi Singh<sup>5</sup>, Jing Zou<sup>6</sup>, Ilmari Pyykkö<sup>6</sup>, Damjana Drobne<sup>3</sup>, Anne Kahru<sup>1\*</sup>

*<sup>1</sup> Laboratory of Environmental Toxicology, National Institute of Chemical Physics and Biophysics, Akadeemia tee 23, 12618 Tallinn, Estonia*

*<sup>2</sup> Faculty of Science and Technology, Institute of Ecology and Earth Sciences, Tartu University, Tartu University, Lai st. 40, Tartu 51005, Estonia*

*<sup>3</sup> University of Ljubljana, Biotechnical Faculty, Večna pot 111, 1000 Ljubljana, Slovenia*

*<sup>4</sup> The Finnish Centre for Alternative Methods (FICAM), School of Medicine, University of Tampere, Tampere, Finland*

*<sup>5</sup> The Centre for Cellular & Molecular Biology, Habsiguda, Hyderabad, Telangana 500007, India*

*<sup>6</sup> Hearing and Balance Research Unit, Field of Oto-laryngology, School of Medicine, University of Tampere, Tampere, Finland*

**\*Corresponding authors:** olesja.bondarenko@kbfi.ee; telephone/fax: +372 639 8362; anne.kahru@kbfi.ee; telephone: +372 6 398 373, fax: +372 639 8362

## SUPPLEMENTARY FIGURES

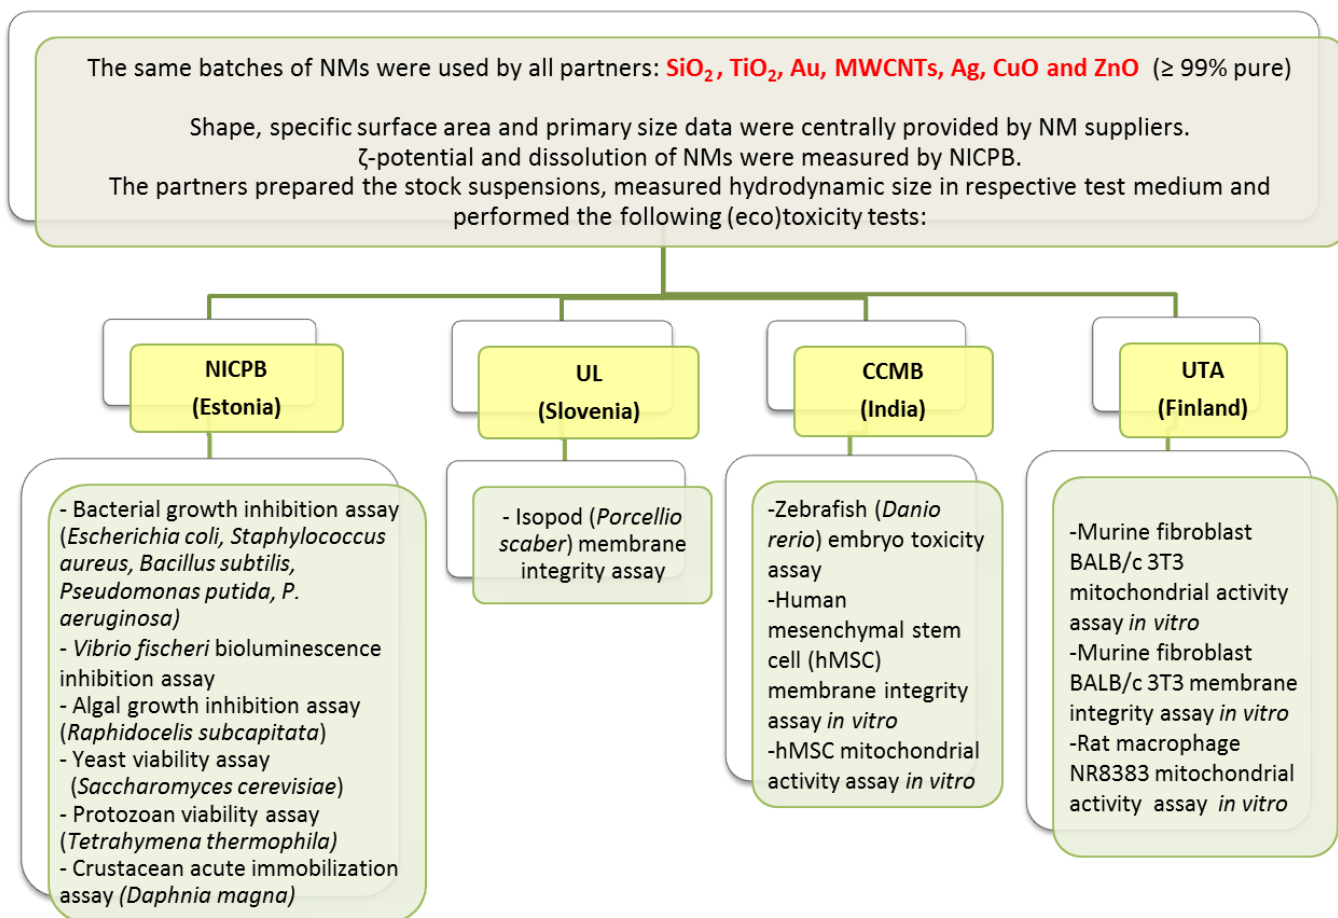

**Fig. S1** Experimental set-up of this study. Yellow boxes represent partner institutions involved: National Institute of Chemical Physics and Biophysics (NICPB, Estonia), University of Ljubljana (UL, Slovenia); Centre for Cellular & Molecular Biology (CCMB, India) and University of Tampere (UTA, Finland). Green boxes present bioassays performed by partner institutions.

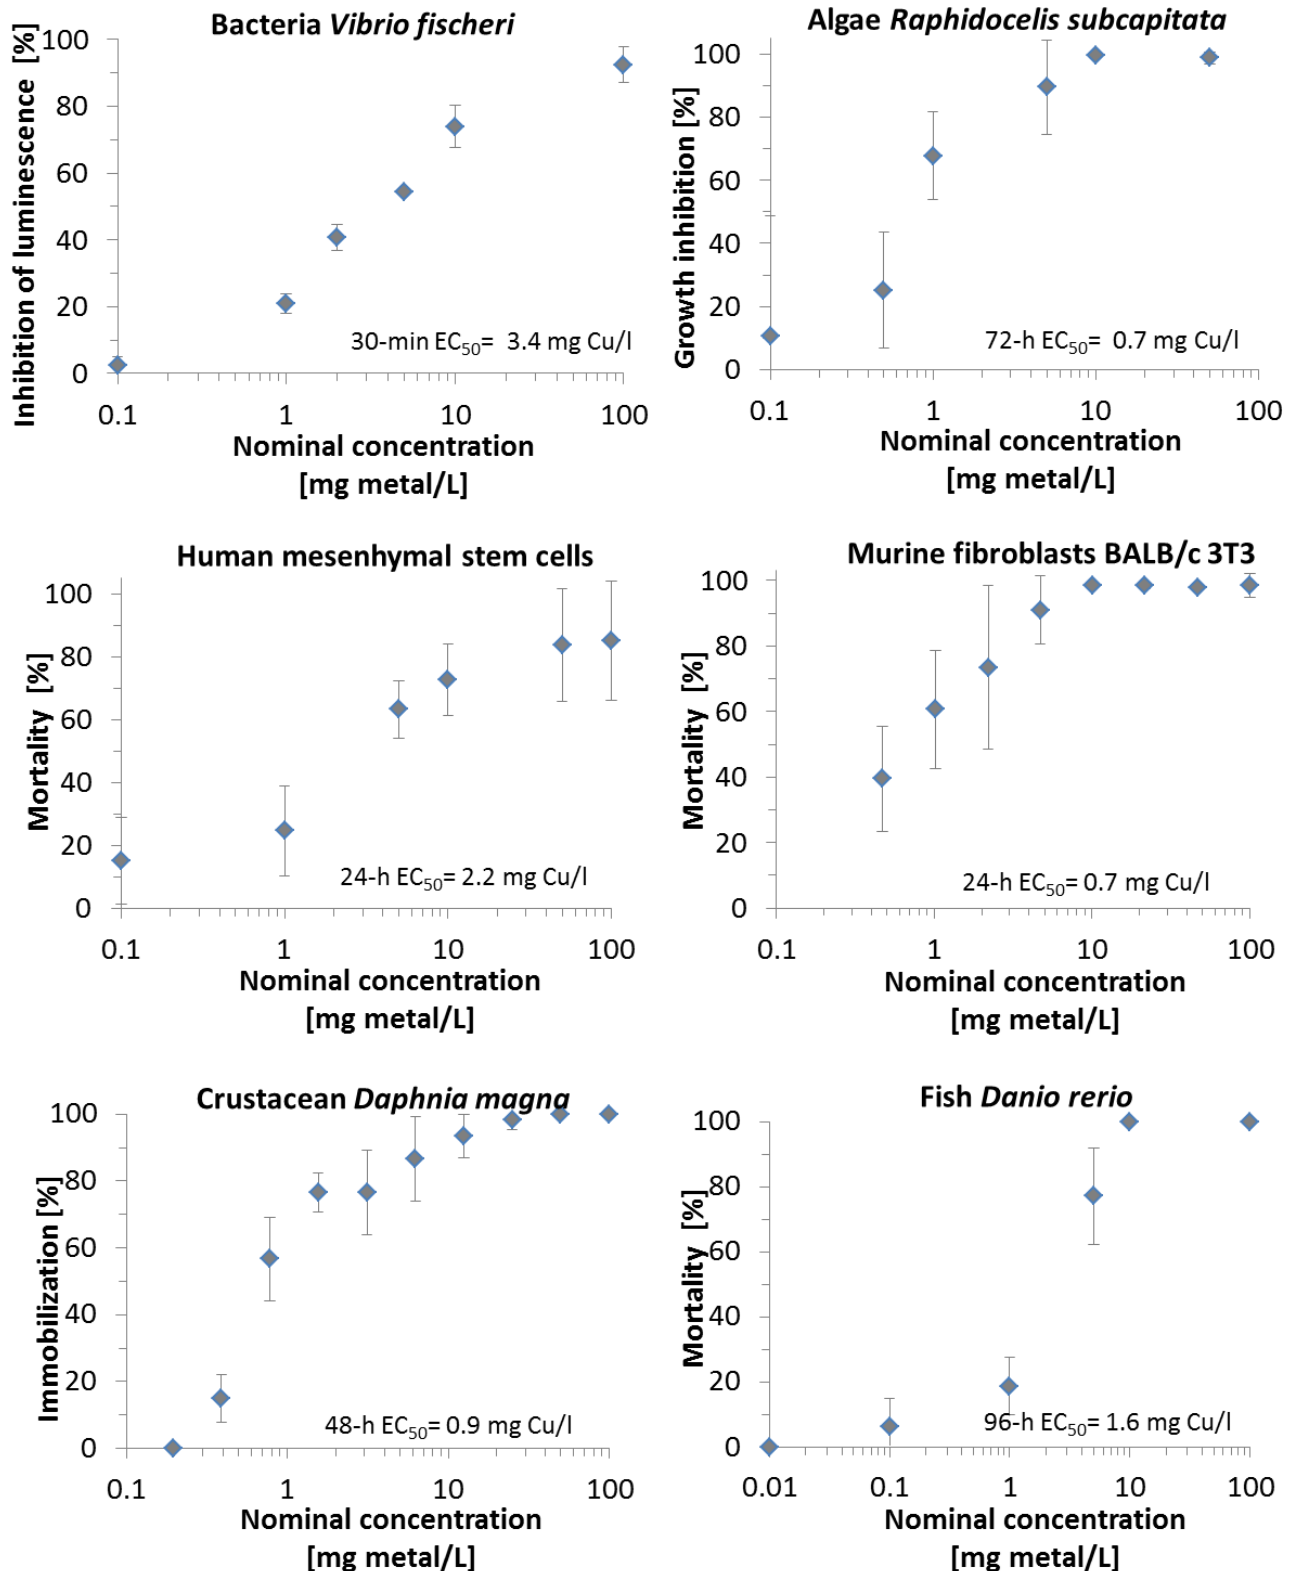

**Fig. S2** Dose-response curves of test organisms to CuO NMs (average from different independent experiments  $\pm$  standard deviations): 30-min *Vibrio fischeri* luminescence inhibition assay, 72-h algal *Raphidocelis subcapitata* growth inhibition assay, 24-h human mesenchymal stem cell membrane integrity assay *in vitro* (propidium iodide staining), 48-h murine fibroblast BALB/c 3T3 mitochondrial activity assay *in vitro* (WST-1), 48-h crustacean *Daphnia magna* acute immobilization assay and 96-h zebrafish *Danio rerio* embryo toxicity assay.

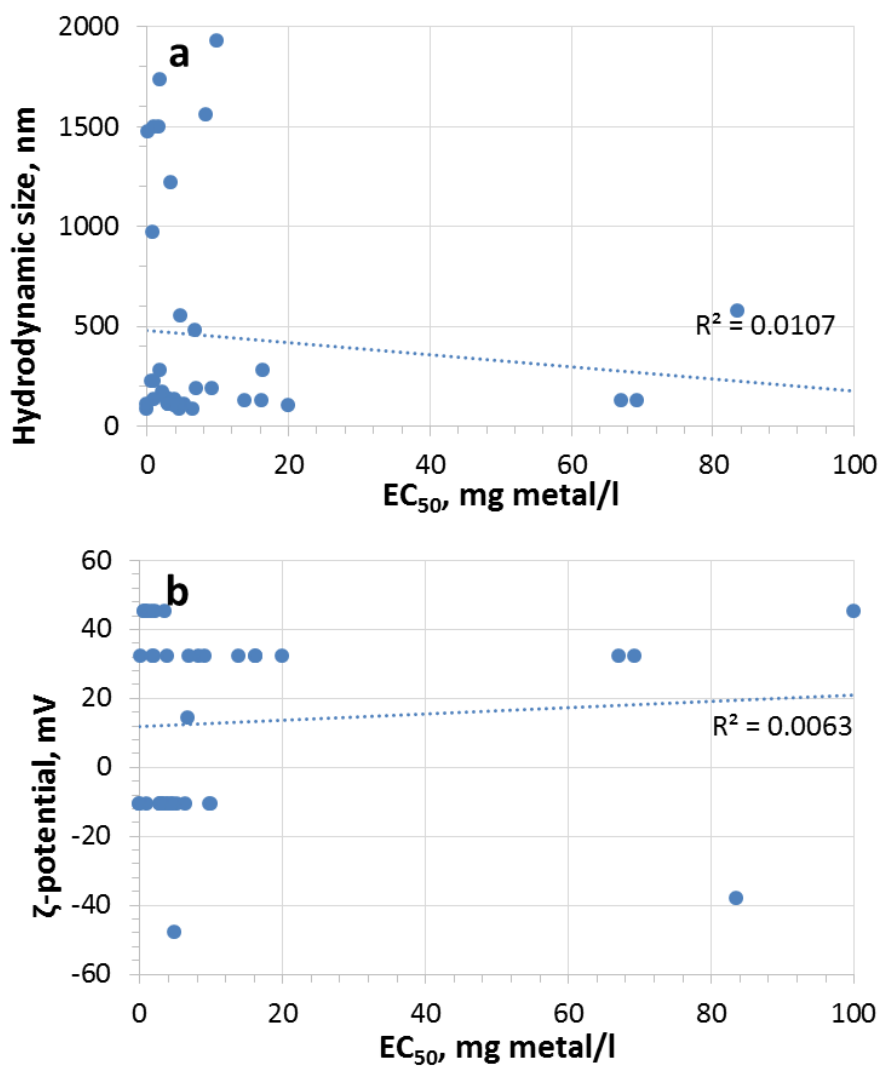

**Fig. S3** Toxicity (EC<sub>50</sub>) of NMs to different organisms *versus* hydrodynamic size in the respective test medium (a) and ζ-potential in DI water (b). EC<sub>50</sub> >100 mg metal/l were not included. Data are plotted from Table 2, Table 4 and Table S2.

## SUPPLEMENTARY TABLES

**Table S1** 95% confidence limits of EC<sub>50</sub> values of dissolution-prone NMs (Table 4) and the number of independent experiments performed to obtain these EC<sub>50</sub> values.

|                                                            | Tests model                           | 95% confidence limit |                  |                  | Number of independent experiments |                |                |
|------------------------------------------------------------|---------------------------------------|----------------------|------------------|------------------|-----------------------------------|----------------|----------------|
|                                                            |                                       | Ag                   | CuO              | ZnO              | Ag                                | CuO            | ZnO            |
| Prokaryotes, single cell                                   | <b>BACTERIA:</b>                      |                      |                  |                  |                                   |                |                |
|                                                            | <i>Escherichia coli</i>               | 1.36-4.76            | not applicable*  | 55.4-78.9        | 4                                 | 2              | 2              |
|                                                            | <i>Staphylococcus aureus</i>          | 1.83-8.55            | not applicable*  | 12.2-20.2        | 4                                 | 2              | 2              |
|                                                            | <i>Bacillus subtilis</i>              | 2.71-6.33            | not applicable*  | 8.8-18.8         | 4                                 | 2              | 2              |
|                                                            | <i>Pseudomonas putida</i>             | 2.31-5.33            | not applicable*  | 26.9-81.6        | 4                                 | 2              | 2              |
|                                                            | <i>Pseudomonas aeruginosa</i>         | 2.0-4.34             | not applicable*  | not applicable*  | 4                                 | 2              | 2              |
|                                                            | <i>Vibrio fischeri</i>                | 2.48-3.36            | 3.29-3.82        | 7.88-12.55       | 4                                 | 2              | 1              |
| Eukaryotes, single cell                                    | <b>YEAST:</b>                         |                      |                  |                  |                                   |                |                |
|                                                            | <i>Saccharomyces cerevisiae</i>       | not applicable**     | not applicable** | not applicable** | 3                                 | 2              | 3              |
|                                                            | <b>ALGAE:</b>                         |                      |                  |                  |                                   |                |                |
| <i>Raphidocelis subcapitata</i>                            | 0.00597 - 0.01003                     | 0.41-1.07            | 0.06 -0.27       | 2                | 2                                 | 2              |                |
| <b>PROTOZOA:</b>                                           |                                       |                      |                  |                  |                                   |                |                |
| <i>Tetrahymena thermophila</i>                             | 3.11-5.11                             | not applicable*      | 3.53-8.12        | 5                | 1                                 | 4              |                |
| Mammalian cell cultures in vitro                           | human mesenchymal stem cells (PI)     | 1.94-10.74           | 0.72-6.78        | 0.91-4.29        | 4                                 | 4              | 5              |
|                                                            | human mesenchymal stem cells (MTT)    | 2.80-8.56            | not applicable*  | 11.4-21.22       | 3                                 | 3              | 3              |
|                                                            | murine fibroblasts BALB/c 3T3 (WST-1) | 2.7-3.3***           | 0.55-0.87        | 6.55-11.6        | 2                                 | 2              | 2              |
|                                                            | murine fibroblasts BALB/c 3T3 (NRU)   | 2.7-2.9***           | 0.93-1.11        | 5.95-7.73        | 2                                 | 2              | 2              |
|                                                            | rat macrophages NR8383 (WST-1)        | 9.4-10.2             | not determined   | not determined   | 2                                 | not determined | not determined |
| Multicellular organisms                                    | <b>CRUSTACEAN:</b>                    |                      |                  |                  |                                   |                |                |
|                                                            | <i>Daphnia magna</i>                  | 0.00206 - 0.00266    | 0.82-1.22        | 1.56-1.91        | 3                                 | 5              | 5              |
|                                                            | <b>CRUSTACEAN:</b>                    |                      |                  |                  |                                   |                |                |
| <i>Porcellio scaber</i> (isolated digestive gland) (AO/EB) | not applicable**                      | not applicable**     | not applicable** | 2                | 2                                 | 2              |                |
| <b>FISH:</b> zebrafish ( <i>Danio rerio</i> ) embryo       | 2.19-4.02                             | 0.84-2.24            | not determined   | 3                | 3                                 | not determined |                |

\*EC<sub>50</sub> >100 mg/l; \*\*Toxicity endpoint is minimal bactericidal concentration (yeast *S. cerevisiae*) or LOEC (crustacean *P. scaber*); \*\*\*Published in Zou et al. 2014. AO/EB, acridine orange/ethidium bromide; MTT, 3-(4,5-Dimethylthiazol-2-yl)-2,5-diphenyltetrazolium bromide; NRU, neutral red uptake; PI, propidium iodide; WST-1, 2-(4-Iodophenyl)-3-(4-nitrophenyl)-5-(2,4-disulfophenyl)-2H-tetrazolium.

**Table S2** Hydrodynamic size of the studied nanomaterials in different test media.

| Test medium                                       | Respective assay                                                              | Hydrodynamic size, nm |                  |                |          |                |                |
|---------------------------------------------------|-------------------------------------------------------------------------------|-----------------------|------------------|----------------|----------|----------------|----------------|
|                                                   |                                                                               | SiO <sub>2</sub>      | TiO <sub>2</sub> | Au             | Ag       | CuO            | ZnO            |
| LB medium <sup>1</sup>                            | Bacterial growth inhibition assay                                             | 921±138               | 759±48           | 24±2           | 107±1.3  | 1039±141       | 125±2          |
| 2% NaCl                                           | <i>Vibrio fischeri</i> bio-luminescence inhibition assay                      | 1101±76               | 865±354          | 552±34         | 137±0.9  | 1221±250       | 1561±123       |
| Deionised (DI) water                              | Yeast spot assay; Protozoan viability assay                                   | 854±38                | 367±60           | 23±4           | 132±0.5  | 152±2          | 102±1          |
| Algal growth medium                               | Algae growth inhibition test                                                  | 575±65                | 478±44           | not determined | 83±2.9   | 970±253        | 1476±576       |
| Artificial freshwater <sup>2</sup>                | <i>Daphnia magna</i> immobilization assay and zebrafish embryo toxicity assay | not determined        | 767±13           | 528±41         | 111±0.6  | 1497±77        | 1733±185       |
| DMEM containing 10% foetal bovine serum (FBS)     | Assays with human mesenchymal stem cells                                      | 6858±1120             | 6513±2783        | 489±120        | 87±1     | 171±4          | 277±44         |
| DMEM containing 5.0% new born calf serum          | Assays with murine fibroblasts BALB/c 3T3                                     | 493±266               | 365±169          | 48±31          | 121±53   | 227±89         | 187±100        |
| Kaighn's Modification of Ham's F-12 with 7.5% FBS | Assays with rat alveolar macrophages NR8383                                   | 620±285               | not determined   | 52±43          | 1929±372 | not determined | not determined |

<sup>1</sup> Composition: 10 g tryptone and 5 g yeast extract *per* liter, pH=7 (NaCl was not added to the medium to reduce the agglomeration of NMs).

<sup>2</sup> 294 mg/l CaCl<sub>2</sub>\*2H<sub>2</sub>O, 123.3 mg/l MgSO<sub>4</sub>\*7H<sub>2</sub>O, 65 mg/l NaHCO<sub>3</sub>, 5.75 mg/L KCl dissolved DI water.
